# Supplementary material
Source: PubMed Central journal article supplement (PMC5323248)
Supplement: NIHMS847462-supplement-Sup-1.pdf [file NIHMS847462-supplement-Sup-1.pdf]

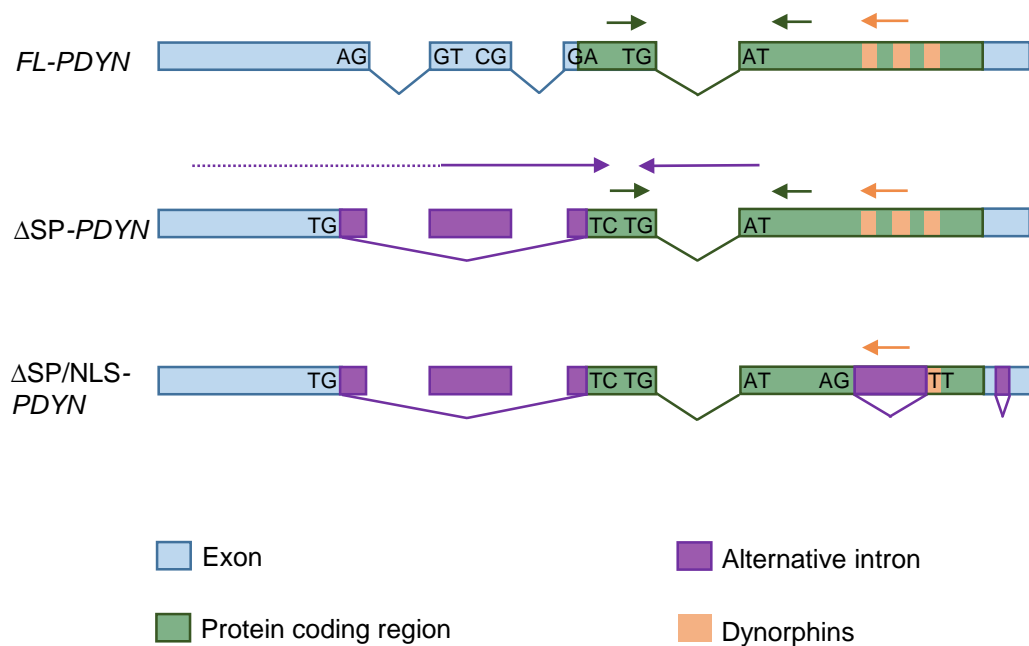

**Figure S1.** The localization of primers used for the cDNA synthesis and for measurements of total *PDYN* transcripts and *ΔSP-PDYN* isoform. Total *PDYN* transcripts are detected using primers overlapping the most abundant exon 3-4 junction (green arrows). Selective *ΔSP-PDYN* detection is achieved with primers overlapping the novel exon 1-3 junction (violet arrows). cDNA synthesis was performed using a primer targeting sequence absent in *ΔSP/NLS-PDYN* (orange arrow), thus this isoform was omitted from qRT-PCR analysis. Splice sites are shown within exons. For specific primer sequences, see Table 2.
