# Supplementary material
Source: PubMed Central journal article supplement (PMC5323248)
Supplement: NIHMS847462-supplement-Sup-2.pdf [file NIHMS847462-supplement-Sup-2.pdf]

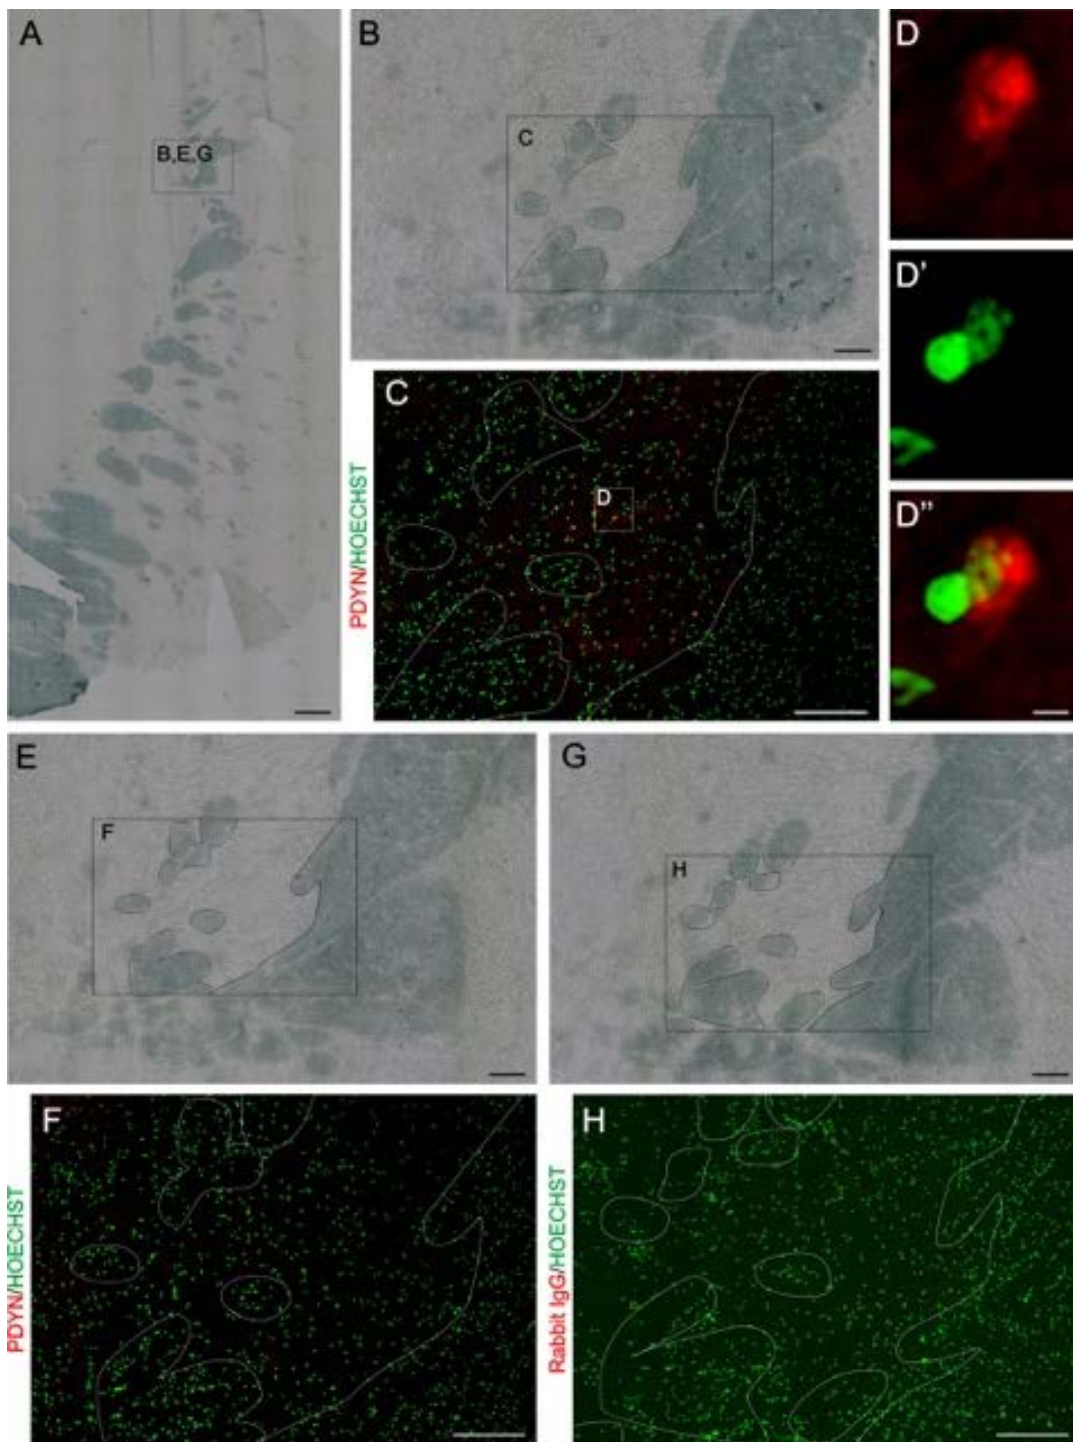

**Figure S2.** Adjacent sections of the human caudate nucleus (**A-H**) were labeled using rabbit anti-PDYN (**C, D**), pre-adsorbed rabbit anti PDYN (**F**) and rabbit IgG (**H**) as it was described in Materials and Methods. Sections were counter stained with Sudan black to block autofluorescence and visualize white matter structures (**A, B, E, and G**). A region containing several PDYN-immunopositive cells and fluorophore-labeled nuclei was identified (**B, C**). Visualization of PDYN immunoreactivity was performed with secondary Cy5 conjugated antibody (red) (**D**) and nuclei were labeled with Hoechst (green) (**D'**). Overlay of PDYN and Hoechst staining (**D''**). Both after adsorption (**F**) and rabbit IgG controls (**H**) revealed low immunoreactivity. Scale bars: **A** = 2 mm; **B, C & E-H** = 150  $\mu$ m; **D** = 10  $\mu$ m.
